# Supplementary material
Source: PubMed Central journal article supplement (PMC8034873)
Supplement: joces-134-258500-s1.pdf [file joces-134-258500-s1.pdf]

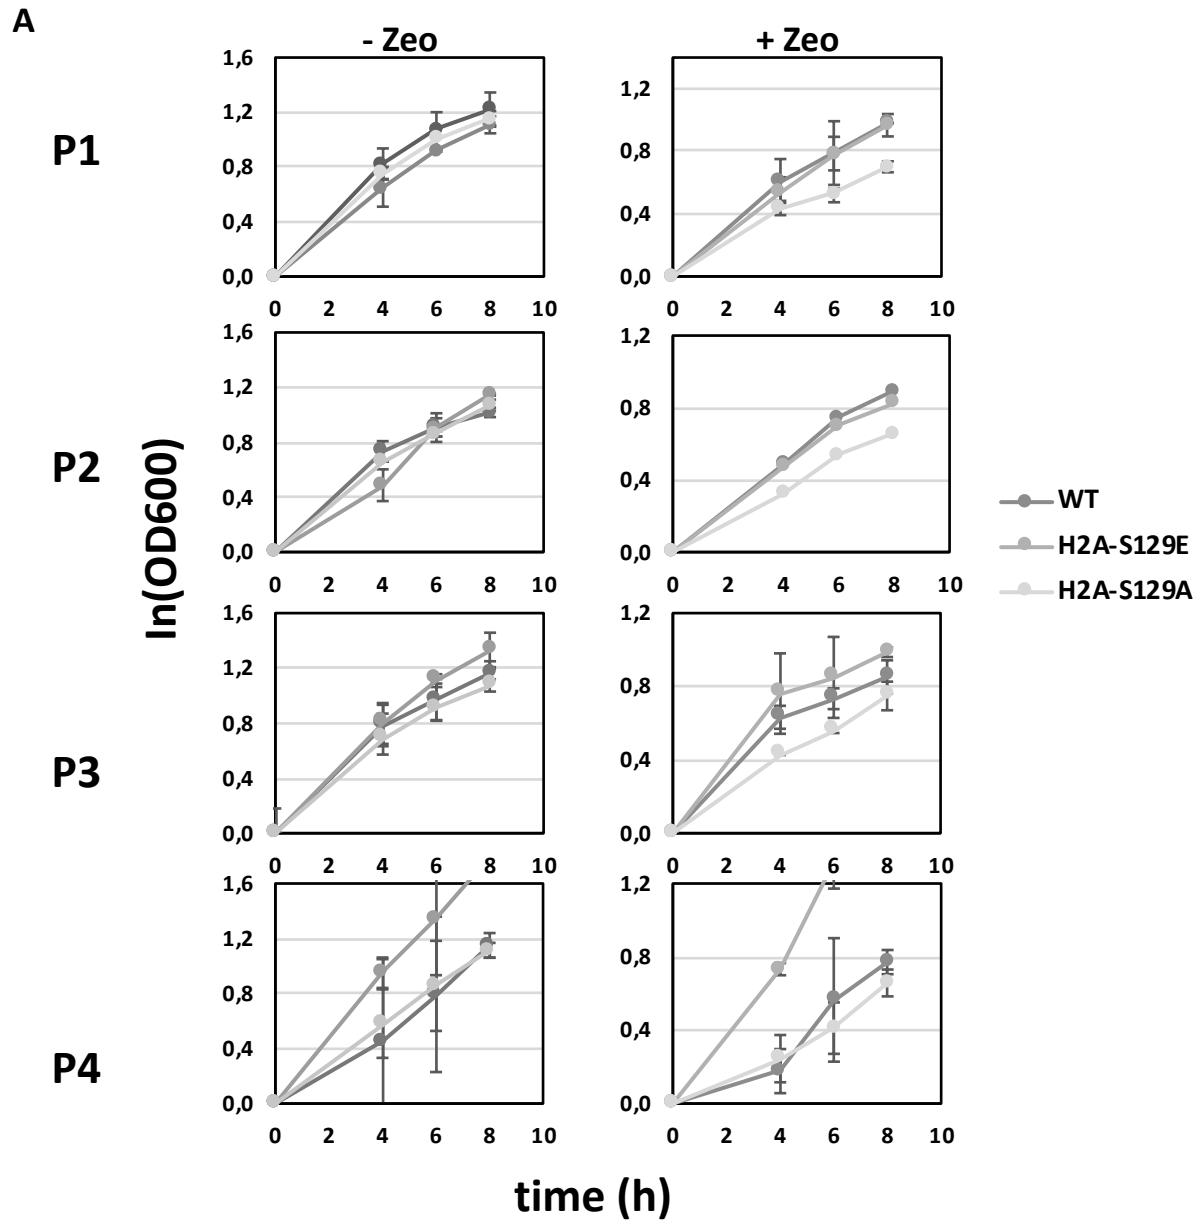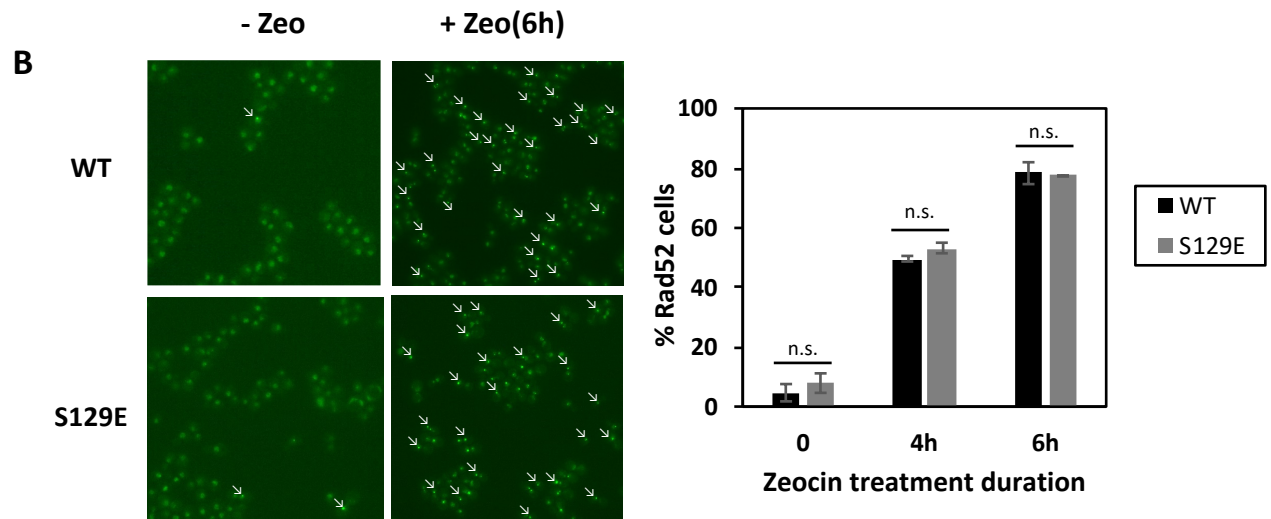

Supplementary Figure 1

## Figure S1.

### **Absence of growth defects and intrinsic DNA damages in H2A-S129E mutant.**

A. Representative growth curves for the WT, H2A-S129A, H2AS129E strains in the absence (left) or presence (right) of 250µg/ml Zeocin treatment. Mean values for two independent experiments are plotted for each time point, with error bars showing standard error of the mean (SE).

B. No intrinsic DNA damage in H2A-S129E in absence of Zeocin treatment but prolonged exposure to Zeocin increases DNA damage. Rad52-GFP foci are shown (arrowheads) in representative images of yeast cells that were either untreated or exposed to 250µg/ml of the genotoxic drug Zeocin for 4 and 6 h in WT (black) and H2A-S129E strain (grey). Bar graphs show mean  $\pm$  s.e.m. P values are calculated after a non-parametric t test (n.s, not significant  $P>0.05$ ).

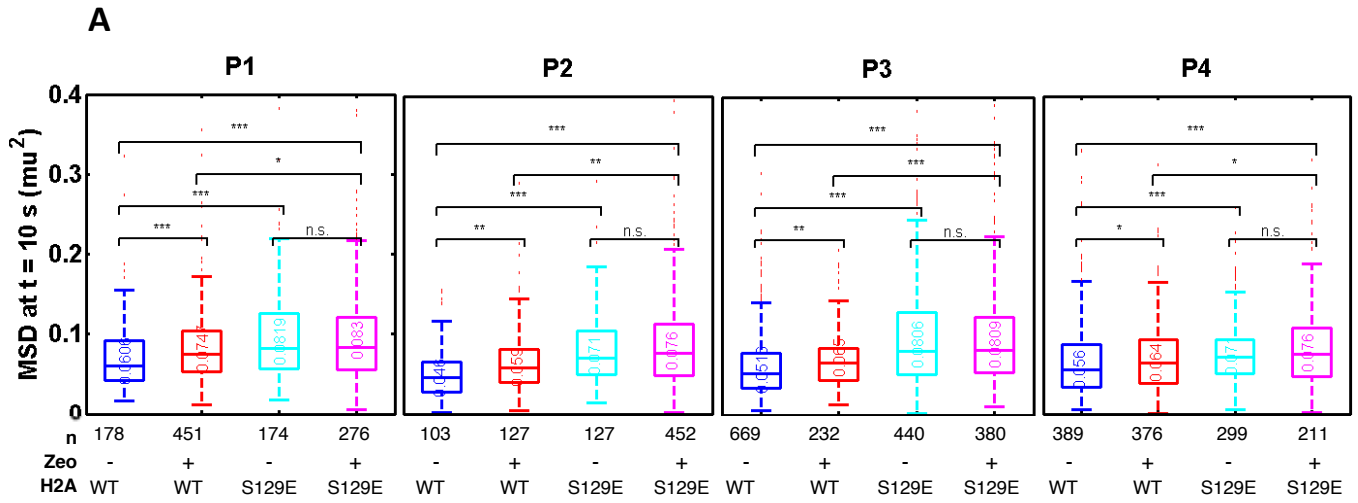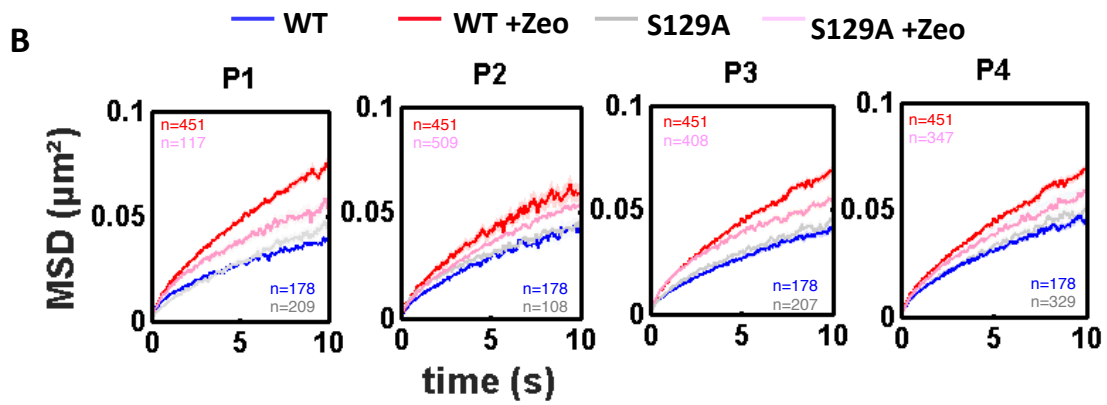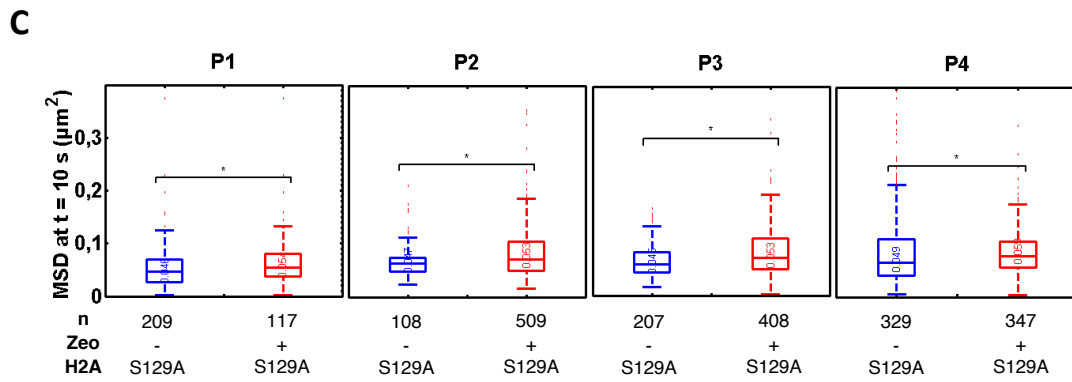

## Figure S2.

### Values of MSDs at 10 sec. in WT, H2A-S129E and H2A-S19E mutated strains

**A.** Values of MSD at 10 sec for WT, H2A-S129E and H2A-S129A. Boxplots show the distribution of MSD at 10 s in absence of Zeocin (WT, blue; H2A-S129E, light blue) or after 3 h Zeocin exposure (WT, red; H2A-S129E, pink), for the four loci Gr1–Gr4. The horizontal line at the center of each box indicates the median value, the bottom and top limits indicate the lower and upper quartiles, respectively. The whiskers indicate the full range of measured values, except for outliers, which are shown as small red dots. Brackets indicate the result of a Wilcoxon rank-sum test between distributions, with “n.s.” for “not significant” ( $P > 0.05$ ), \* for  $P < 0.05$ , \*\* for  $P < 10^{-2}$  and \*\*\* for  $P < 10^{-3}$ .

**B.** MSDs for WT and H2A-S129A. Mean square displacement measured as in figure 1D as function of time interval of the four Gr1 to Gr4 green loci in H2A-S129A background. Blue and red curves are for untreated and treated Wild-Type cells (WT); grey and pink curves are for untreated and treated H2A-S129A mutant, respectively. The numbers of cells used to compute each curve (n) are indicated.

**C.** Values of MSD at 10 sec for H2A-S129A in the presence or absence of treatment. Boxplots show the distribution of MSD at 10 s as in B, in absence of Zeocin (blue) or after 3 h Zeocin exposure (red), for the four loci Gr1–Gr4 in H2A-S129A mutated background.

**A**

% of G2/M arrested cells

|     | WT |    | H2A-S129E |    | $\Delta rad9$ |   | $\Delta rad9$<br>H2A-S129E |    |
|-----|----|----|-----------|----|---------------|---|----------------------------|----|
| ZEO | -  | +  | -         | +  | -             | + | -                          | +  |
| %   | 10 | 92 | 9         | 89 | 3             | 4 | 7                          | 94 |

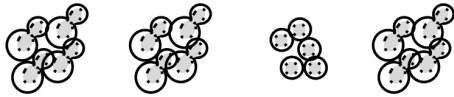

**+ Zeo**

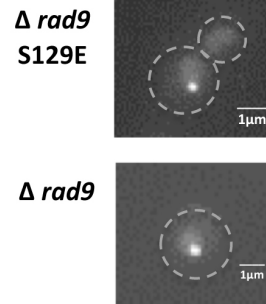

**B**

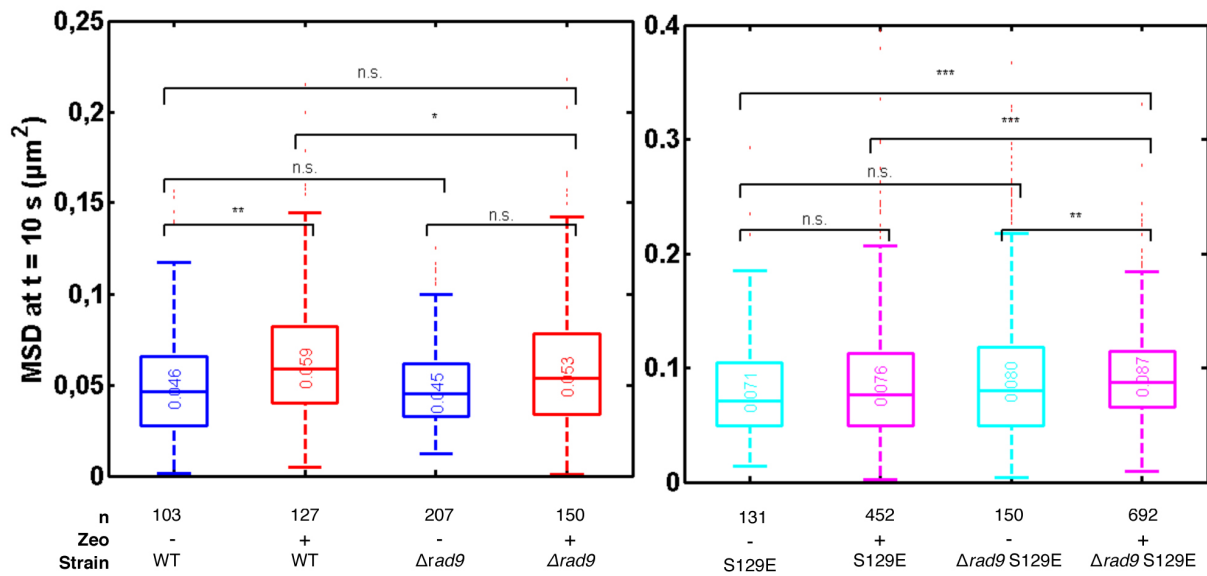

Supplementary Figure 3

### Figure S3.

#### Percent of G2/M arrested cells and values of MSD at 10 sec for WT, H2A-S129E, $\Delta rad9$ and $\Delta rad9$ H2A-S129E mutated cells in the absence or the presence of Zeocin for.

A. Cells expressing fluorescent LacI-GFP protein to lacO-array were inspected after image acquisition. Unbound LacI-GFP was used as a nuclear staining. G2/M arrested cells show nuclear masses separated between mother and daughter cells, but no septum formed. Examples are shown on the right.

B. Boxplots show the distribution of MSD at 10 s of WT compared to  $\Delta rad9$  strains (left) and H2A-S129E compared to  $\Delta rad9$  H2A-S129E double mutant (right) in absence of Zeocin (bleu and cyan, respectively) or after 6 h Zeocin exposure (red and magenta, respectively). The horizontal line at the center of each box indicates the median value, the bottom and top limits indicate the lower and upper quartiles, respectively. The whiskers indicate the full range of measured values, except for outliers, which are shown as small red dots. Brackets indicate the result of a Wilcoxon rank-sum test between distributions, with “n.s.” for “not significant” ( $P > 0.05$ ), \* for  $P < 0.05$ , \*\* for  $P < 10^{-2}$  and \*\*\* for  $P < 10^{-3}$ . Analyzed cells range from (n) ~100 - ~1000.

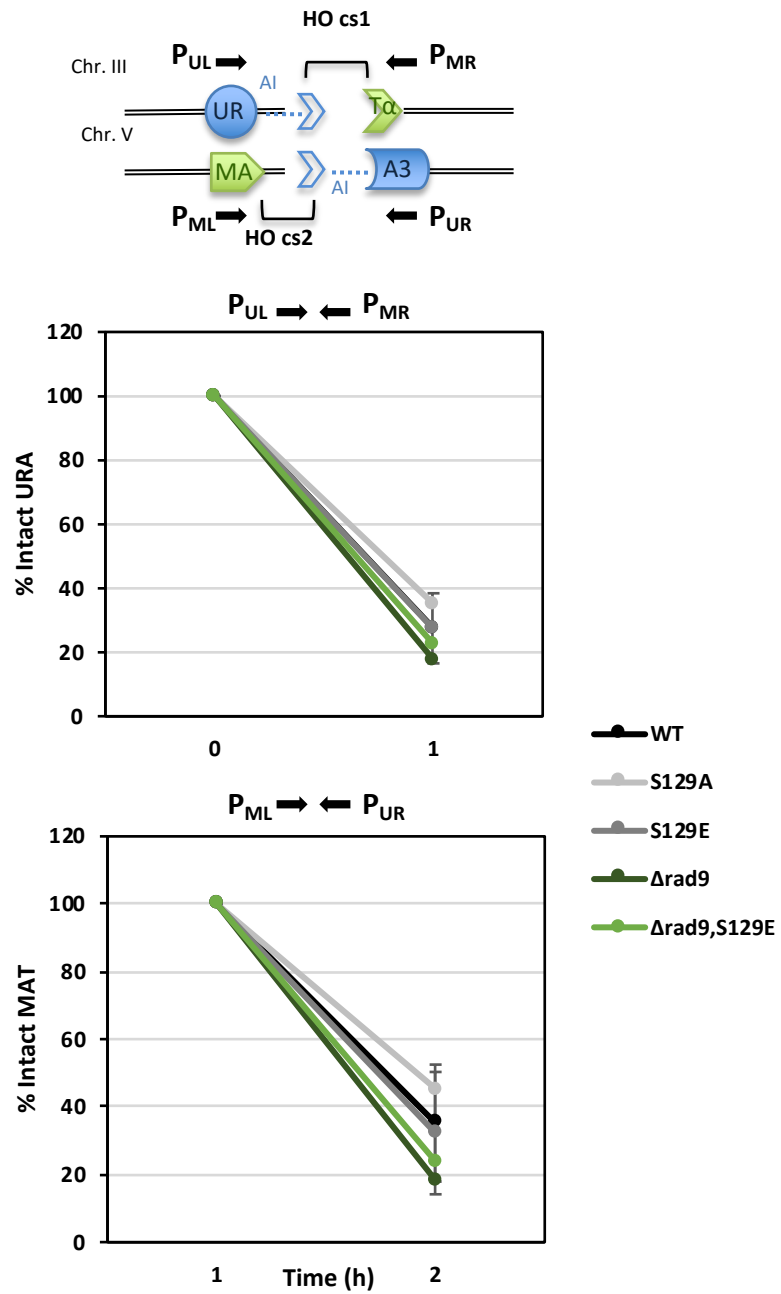

Supplementary Figure 4

## Figure S4

### Efficiency of the two HO-cleavages in translocation assay strains by Q-PCR.

Efficiency of HO cleavage in WT, H2A-S129A, H2A-S129E,  $\Delta rad9$  and  $\Delta rad9$ , H2A-S129E strains carrying the two HO cleavage sites at the  $MAT\alpha$  and  $URA3$  locus was determined by quantitative PCR using primers flanking HO recognition sites before (t0h) and after (t1h) galactose induction, normalized by the amount of  $ACT1$  sequence.



| STRAINS                    |                               |                                                                                                                                                                                                                |                  |
|----------------------------|-------------------------------|----------------------------------------------------------------------------------------------------------------------------------------------------------------------------------------------------------------|------------------|
| Common name                | Strain                        | Genotype                                                                                                                                                                                                       | Reference        |
| <b>Green-Red pairs</b>     |                               |                                                                                                                                                                                                                |                  |
| P1                         | YHB76-4-a                     | Mat a, ura3Δ0, leu2Δ0, his3Δ1, lys2Δ202, ade2-661, can1::HPHMX, iYGL117::tetR-mRFP- NATMX, yDR003w::tetO-TEF-URA, HIS3::HIS3-LacI-GFP, yDR095C::256lacO-TEF-LEU2                                               | (Herbert:2017it) |
| P2                         | YHB103-1-a                    | Mat a, ura3Δ0, leu2Δ0, his3Δ1, lys2Δ202, ade2-661, can1::HPHMX, iYGL117::tetR-mRFP- NATMX, yDR199w::tetO-TEF-URA3, HIS3::HIS3-LacI-GFP, yDR297w::256lacO-TEF-LEU2                                              | (Herbert:2017it) |
| P3                         | YHB215-2-alpha                | Mat alpha, ura3Δ0, leu2Δ0, his3Δ1, lys2Δ202, ade2-661, iYGL117::tetR-mRFP- NATMX, yDR354w::tetO-TEF-URA3, HIS3::HIS3-LacI-GFP, yDR259C::256lacO-TEF-LEU2                                                       | (Herbert:2017it) |
| P4                         | YHB154-1-alpha                | Mat alpha, ura3Δ0, leu2Δ0, his3Δ1, ade2-661, yDR539w::112tetO-TEF-URA3, iYGL117::tetR-mRFP- NATMX, HIS3::HIS3-LacI-GFP, yDR445C::256lacO-TEF-LEU2                                                              | (Herbert:2017it) |
| <b>H2A mutants</b>         |                               |                                                                                                                                                                                                                |                  |
| P1 S129E                   | YEF 1259                      | Mat a, ura3Δ0, leu2Δ0, his3Δ1, lys2Δ202, ade2-661, can1::HPHMX, iYGL117::tetR-mRFP NATMX yDR003W::tetO-URA3 HIS3::HIS3-LacI-GFP yDR095C::lacO-TEF-LEU2, hta1::HTA1-S129E, hta2::HTA2-S129E                     | This study       |
| P2 S129E                   | YEF 1111                      | Mat a, ura3Δ0, leu2Δ0, his3Δ1, lys2Δ202, ade2-661, can1::HPHMX, iYGL117::tetR-mRFP NATMX yDR199W::tetO-URA3 HIS3::HIS3-LacI-GFP yDR297W::lacO-TEF-LEU2, hta1::HTA1-S129E, hta2::HTA2-S129E                     | This study       |
| P3 S129E                   | YEF 1261                      | Mat a, ura3Δ0, leu2Δ0, his3Δ1, lys2Δ202, ade2-661, iYGL117::tetR-mRFP NATMX yDR354W::tetO-URA3 HIS3::HIS3-LacI-GFP yDR259C::lacO-TEF-LEU2 , hta1::HTA1-S129E, hta2::HTA2-S129E                                 | This study       |
| P4 S129E                   | YEF 1163                      | Mat alpha, ura3Δ0, leu2Δ0, his3Δ1, ade2-661, yDR539w::112tetO-TEF-URA3, iYGL117::tetR-mRFP NATMX yDR354W::tetO-URA3 HIS3::HIS3-LacI-GFP yDR445C::lacO-TEF-LEU2, hta1::HTA1-S129E, hta2::HTA2-S129E             | This study       |
| P1 S129A                   | YEF 1030                      | Mat a, ura3Δ0, leu2Δ0, his3Δ1, lys2Δ202, ade2-661, can1::HPHMX, iYGL117::tetR-mRFP NATMX yDR003W::tetO-URA3 HIS3::HIS3-LacI-GFP yDR095C::lacO-TEF-LEU2, hta1::HTA1-S129A-KANMX , hta2::HTA2-S129A-ADE2         | (Herbert:2017it) |
| P2 S129A                   | YEF 1028                      | Mat a, ura3Δ0, leu2Δ0, his3Δ1, lys2Δ202, ade2-661, can1::HPHMX, iYGL117::tetR-mRFP NATMX yDR199W::tetO-URA3 HIS3::HIS3-LacI-GFP yDR297W::lacO-TEF-LEU2, hta1::HTA1-S129A-TRP1, hta2::HTA2-S129A-ADE2           | (Herbert:2017it) |
| P3 S129A                   | YEF 1032                      | Mat a, ura3Δ0, leu2Δ0, his3Δ1, lys2Δ202, ade2-661, iYGL117::tetR-mRFP NATMX yDR354W::tetO-URA3 HIS3::HIS3-LacI-GFP yDR259C::lacO-TEF-LEU2, hta1::HTA1-S129A-KANMX , hta2::HTA2-S129A-ADE2                      | (Herbert:2017it) |
| P4 S129A                   | YEF 1034                      | Mat alpha, ura3Δ0, leu2Δ0, his3Δ1, ade2-661, yDR539w::112tetO-TEF-URA3, iYGL117::tetR-mRFP NATMX yDR354W::tetO-URA3 HIS3::HIS3-LacI-GFP yDR445C::lacO-TEF-LEU2, hta1::HTA1-S129A-KANMX , hta2::HTA2-S129A-ADE2 | (Herbert:2017it) |
| <b>rad9 mutants</b>        |                               |                                                                                                                                                                                                                |                  |
| P2 rad9                    | YEF 1187                      | Mat a, ura3Δ0, leu2Δ0, his3Δ1, lys2Δ202, ade2-661, can1::HPHMX, iYGL117::tetR-mRFP NATMX YDR199W::tetO-URA3 HIS3::HIS3-LacI-GFP yDR297W::lacO-TEF-LEU2, yDR217C::KANMX                                         | This study       |
| P2 rad9 S129E              | YEF 1188                      | Mat a, ura3Δ0, leu2Δ0, his3Δ1, lys2Δ202, ade2-661, can1::HPHMX, iYGL117::tetR-mRFP NATMX YDR199W::tetO-URA3 HIS3::HIS3-LacI-GFP yDR297W::lacO-TEF-LEU2, hta1::HTA1-S129E, hta2::HTA2-S129E, yDR217C::KANMX     | This study       |
| <b>Repair Assay</b>        |                               |                                                                                                                                                                                                                |                  |
| Δku70                      | YEF571                        | Mat a, ura3Δ0, leu2Δ0, his3Δ1, trp1Δ63, ade2-661, yMR284W::KANMX                                                                                                                                               | Euroscarf        |
| <b>Translocation Assay</b> |                               |                                                                                                                                                                                                                |                  |
| Tr WT                      | YEF 1375                      | ho Δ MATA3'::intron:ura3Δ5' hmlΔ::ADE1 hmrΔ::ADE1 ura3Δ3'::intron::Hocs ade3::GAL::HO                                                                                                                          | (Lee:2008it)     |
| Tr S129E                   | YEF 1377                      | ho Δ MATA3'::intron:ura3Δ5' hmlΔ::ADE1 hmrΔ::ADE1 ura3Δ3'::intron::Hocs ade3::GAL::HO, hta1::HTA1-S129E, hta2::HTA2-S129E                                                                                      | This study       |
| Tr S129A                   | YEF 1378                      | ho Δ MATA3'::intron:ura3Δ5' hmlΔ::ADE1 hmrΔ::ADE1 ura3Δ3'::intron::Hocs ade3::GAL::HO, hta1::HTA1-S129A, hta2::HTA2-S129A                                                                                      | This study       |
| Tr rad9                    | YEF 1405                      | ho Δ MATA3'::intron:ura3Δ5' hmlΔ::ADE1 hmrΔ::ADE1 ura3Δ3'::intron::Hocs ade3::GAL::HO, yDR217C::KANMX                                                                                                          | This study       |
| Tr rad9 S129E              | YEF 1406                      | ho Δ MATA3'::intron:ura3Δ5' hmlΔ::ADE1 hmrΔ::ADE1 ura3Δ3'::intron::Hocs ade3::GAL::HO, hta1::HTA1-S129E, hta2::HTA2-S129E, yDR217C::KANMX                                                                      | This study       |
| <b>SPB-Cen4 strains</b>    |                               |                                                                                                                                                                                                                |                  |
| WT                         | YEF 1019                      | CENIV-tetO, tetR-GFP, spc42::SPC42::mCherry-HIS3                                                                                                                                                               | This study       |
| H2A S129E                  | YEF 1364                      | CENIV-tetO, tetR-GFP, spc42::SPC42::mCherry-HIS3, hta1::HTA1-S129E, hta2::HTA2-S129E                                                                                                                           | This study       |
| H2A S129A                  | YEF 1366                      | CENIV-tetO, tetR-GFP, spc42::SPC42::mCherry-HIS3, hta1::HTA1-S129A, hta2::HTA2-S129A                                                                                                                           | This study       |
| <b>PLASMIDS</b>            |                               |                                                                                                                                                                                                                |                  |
| Name                       | Description                   | Marker                                                                                                                                                                                                         | Reference        |
| pEF562                     | ycas9- PHU91                  | KANMX (ARS-CEN)                                                                                                                                                                                                | J. Haber         |
| pEF567                     | pEF562+guide HTA1             | KANMX (ARS-CEN)                                                                                                                                                                                                | This study       |
| pEF568                     | pEF562+guide HTA2             | KANMX (ARS-CEN)                                                                                                                                                                                                | This study       |
| PRS413                     | PRS413 (SacI site)            | HIS3 (ARS-CEN)                                                                                                                                                                                                 | Addgene          |
| <b>PRIMERS</b>             |                               |                                                                                                                                                                                                                |                  |
| Name                       | Description                   | Sequence                                                                                                                                                                                                       | Reference        |
| pFGF 001                   | HTA1 guide forward            | CTTCTCAAGAATTATAAGATGTTTT                                                                                                                                                                                      | This study       |
| pFGF 002                   | HTA1 guide reverse            | ATCTTATAATCTTGAGAAGGATCA                                                                                                                                                                                       | This study       |
| pFGF 003                   | HTA2 guide forward            | TTACAGTCTCTGAGAAGCTTTGTTTT                                                                                                                                                                                     | This study       |
| pFGF 004                   | HTA2 guide reverse            | AAGCTTCTCAAGAACTGTAGATCA                                                                                                                                                                                       | This study       |
| pFGF 005                   | AmpB reverse                  | AGCTGAATGAAGCCATCAACCAACGA                                                                                                                                                                                     | This study       |
| pFGF 006                   | 80 nt donor sequence for HTA1 | GAAGTCTGCCAAGGCTCAAGGCTGAACAAGAATTATAAGATCGGTCTGGTATTTAAAGAAAGCGGAA                                                                                                                                            | This study       |
| pFGF 007                   | 80 nt donor sequence for HTA2 | CAAACTTGTGCCAAGAAGCTGCCAAGACTGCCAAGCTGaaCAAGAAGCTGAAGAAGCTGAGTTAAAAGAAACAAA                                                                                                                                    | This study       |
| pFGF 008                   | HTA1 verification forward     | GTTCGCAAGAAGCTGCCTCA                                                                                                                                                                                           | This study       |
| pFGF 009                   | HTA1 verification reverse     | TGGAGAAGCAGTTTGTATTCCTT                                                                                                                                                                                        | This study       |
| pFGF 010                   | HTA2 verification forward     | AATGTTACCATCGCCCAAGG                                                                                                                                                                                           | This study       |
| pFGF 011                   | HTA2 verification reverse     | ACCAGTCTTCTCATATGACCT                                                                                                                                                                                          | This study       |
| pFGF 012                   | rad9 integration forward      | ACGGCCTTGTAGCGTTAGA                                                                                                                                                                                            | This study       |
| pFGF 013                   | rad9 integration reverse      | CCATTGGGGTGAAGCTTCGTT                                                                                                                                                                                          | This study       |
| pFGF 014                   | rad9 verification forward     | TCAAGGGGAAGTGTGAGCAA                                                                                                                                                                                           | This study       |
| pFGF 015                   | rad9 verification reverse     | TGCTGATATGTGTCTGCCA                                                                                                                                                                                            | This study       |
| pFGF 016                   | m13 forward                   | GTAAACGACGGCCAGT                                                                                                                                                                                               | Addgene          |
| pFGF 017                   | m13 inverse                   | GTCATAGCTGTTCTCG                                                                                                                                                                                               | Addgene          |

**Table S1. Strains, plasmids and primers used in this study.**
